# Supplementary material for: Electrospray deposition-induced ambient phase transition in copper sulphide nanostructures
Source: Royal Society of Chemistry journal article supplement (doi:10.1039/c9ta00003h), 2019-01-01
Supplement: c9ta00003h1.pdf [file c9ta00003h1.pdf]

## Supplementary Information

### Electrospray Deposition-Induced Ambient Phase Transition in Copper Sulphide Nanostructures

Arijit Jana, Sourav Kanti Jana, Depanjan Sarkar, Tripti Ahuja, Pallab Basuri, Biswajit Mondal, Sandeep Bose, Jyotirmoy Ghosh, Thalappil Pradeep\*

DST Unit of Nanoscience (DST UNS) and Thematic Unit of Excellence (TUE), Department of Chemistry, Indian Institute of Technology, Madras, Chennai – 600036, India.

\*Email: [pradeep@iitm.ac.in](mailto:pradeep@iitm.ac.in)

#### Table of Contents

| Item     | Description                                                                                    | Page No. |
|----------|------------------------------------------------------------------------------------------------|----------|
|          | Experimental section                                                                           | 2-3      |
|          | Instrumentation                                                                                | 3        |
| Fig. S1  | Optical images of the capillary tip                                                            | 4        |
| Fig. S2  | TEM images of sulphur spray over a TEM grid                                                    | 5        |
| Table S1 | Voltage and distance dependent spray current measurements during ESD                           | 6        |
| Fig. S3  | SEM image of copper sulphide growth at different copper substrate                              | 7        |
| Fig. S4  | EDAX spectrum of Cu <sub>2</sub> S nanopyramids                                                | 7        |
| Fig. S5  | EDAX spectrum of Cu <sub>1.8</sub> S platelets                                                 | 8        |
| Fig. S6  | Schematic representation of the photoelectrochemical process on Cu <sub>2</sub> S nanopyramids | 9        |
| Fig. S7  | Schematic representation of scotch tape peeled off method of Cu <sub>1.8</sub> S platelets     | 10       |
| Fig. S8  | Optical microscopic images of Cu <sub>1.8</sub> S platelets assembled film                     | 10       |
| Fig. S9  | SEM images of Cu <sub>1.8</sub> S platelets assembled film                                     | 11       |

## Experimental Section

### 1) Electrospray deposition:

Electrospray deposition experiments were carried out using a home-made nanospray emitter. For all the ESD experiments, a glass capillary emitter was tailored by pulling borosilicate glass capillary of proper dimension (0.86 mm inner diameter, 1.5 mm outer diameter and 1.5 cm length) using a micropipette puller instrument (P-97) purchased from Sutter instruments, USA. A platinum filament was used to cut the glass capillary into two parts. Prior to making ultrafine capillary tip (20 to 25  $\mu\text{m}$ ), operating conditions of the micropipette puller were set as heating temperature of 565  $^{\circ}\text{C}$ , initial and final pull velocities of 11  $\mu\text{m}/\text{sec}$  and 9  $\mu\text{m}/\text{sec}$ , respectively. Optical microscopic images of the as prepared capillary tips are shown in the Fig. S1. Sulphur solution in toluene: methanol mixture (8:2, v/v) was filled in the capillary tip, by using a capillary injector. Finally, a platinum wire connected with the positive terminal of the high voltage DC power supply was inserted inside the capillary and while the negative terminal was connected to the copper plate to generate the spray plume. Formation of spherical sulphur was observed during ESD. Fig. S2 shows the TEM images of the sulphur particles with diameters of 100 to 150 nm, after 1 min sulphur spray over the TEM grid. A  $532 \pm 10$  nm ( $\leq 10$  mW) green laser pointer was used for confirming the generation of the spray plume. This laser pointer was purchased from UKTECHLAB, UK. During ESD, spray current was measured by using a Keithley Picoammeter. All the spray current data are summarized in Table S1. To confirm the chemical nature of the spray plume, mass spectrum was collected using an ion trap LTQ XL (Thermo Scientific) mass spectrometer.

### 2) Solution phase photoconductivity measurements of $\text{Cu}_2\text{S}$ nanopyrramids:

For the photoelectrochemical measurements of the  $\text{Cu}_2\text{S}$  nanopyrramids, a CHI600A potentiostat was used, while impedance spectroscopic measurements were carried out by using a Bio-Logic SP-200 instrument. Both the electrochemical measurements were performed in 0.01 (M)  $\text{Na}_2\text{SO}_4$  solution, used as an electrolyte. A 195 W white light source from Newport, India was used as a source for solar energy irradiation. The formation of the gas bubbles during photo-electrochemical process was analyzed by a Thermostar Balzer MS instrument. Quadstar 32 Bit software was used to record the data.

### 3) Solid state conductivity measurements of $\text{Cu}_{1.8}\text{S}$ platelets assembled film:

For studying the electrical property of the  $\text{Cu}_{1.8}\text{S}$  platelets, we peeled off the platelets by using a Scotch tape. Basic schematic representation of the peeled off methods was shown in Fig. S8. After etching the platelets from the copper plate, a black thin film was formed on the Scotch-tape. Continuous

arrangements of the platelets was confirmed by using optical and SEM images, shown in Fig. S9 and S10, respectively. This film was used to measure the electrical conductivity. Afterwards, we made four probe contacts on the film by using silver paste and ultrafine copper wires. Among four contacts, two contacts were connected to the positive terminal and while the other two contacts were connected to the negative terminal of the potentiostat. A CHI600A instrument was used to study the current-voltage (I-V) response of the film in a wide potential range (-1.5V to +1.5V).

## **Instrumentation**

### **1) Microscopic characterization:**

All the SEM measurements were performed using a FEI Quanta environmental scanning electron microscope (ESEM) in the high vacuum mode. EDAX spectra were recorded using the same instrument. TEM measurements were performed using a JEOL 3010 high resolution transmission electron microscope (HRTEM) operated at 200 kV. A Gatan 794 multiscan CCD camera was used for image collection. All the optical microscopic images were collected using a LEICA optical microscope with LAS V4.8 software.

### **2) Spectroscopic characterization:**

Raman spectroscopic measurements were carried out by using a confocal Raman microscope, CRM Alpha 300 S, WITec GmbH, Germany by using 532 nm frequency doubled Nd: YAG laser with 40 mW output power (sample power was used  $\leq 5$  mW). X Ray photoelectron spectroscopy (XPS) measurements were carried out using an ESCA probe TPD equipped with polychromatic Mg K $\alpha$  X ray light source ( $h\nu = 1253.6$  eV). Powder XRD measurements were conducted using a D8 Advance Bruker, using Cu K $\alpha$  as the X Ray source ( $h\nu = 8047.8$  eV).

Optical absorption spectroscopic measurements were carried out in the solid state, by using a Perkin Elmer LAMBDA 950 UV-VIS-NIR spectrophotometer. Spectrum was collected in the diffuse reflectance mode (% R) using 60 mm integrating sphere. Perkin Elmer UV Win-lab 6.4.0.973 software was used to collect the spectrum in reflectance mode and the spectrum was converted to Kubelka Munk (K-M) absorption spectrum. Solid state photoluminescence spectral measurements were carried out using the same Raman microscope.

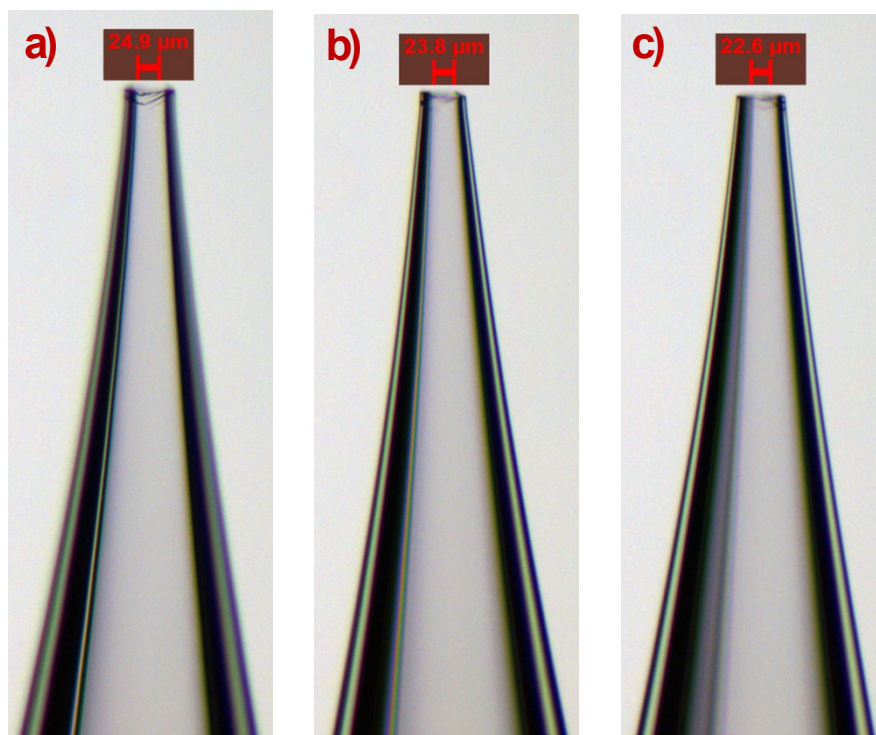

**Fig. S1** Optical microscopic images of three different capillary tips, made separately with tip diameters of a) 24.9, b) 23.8 and c) 22.6  $\mu\text{m}$ .

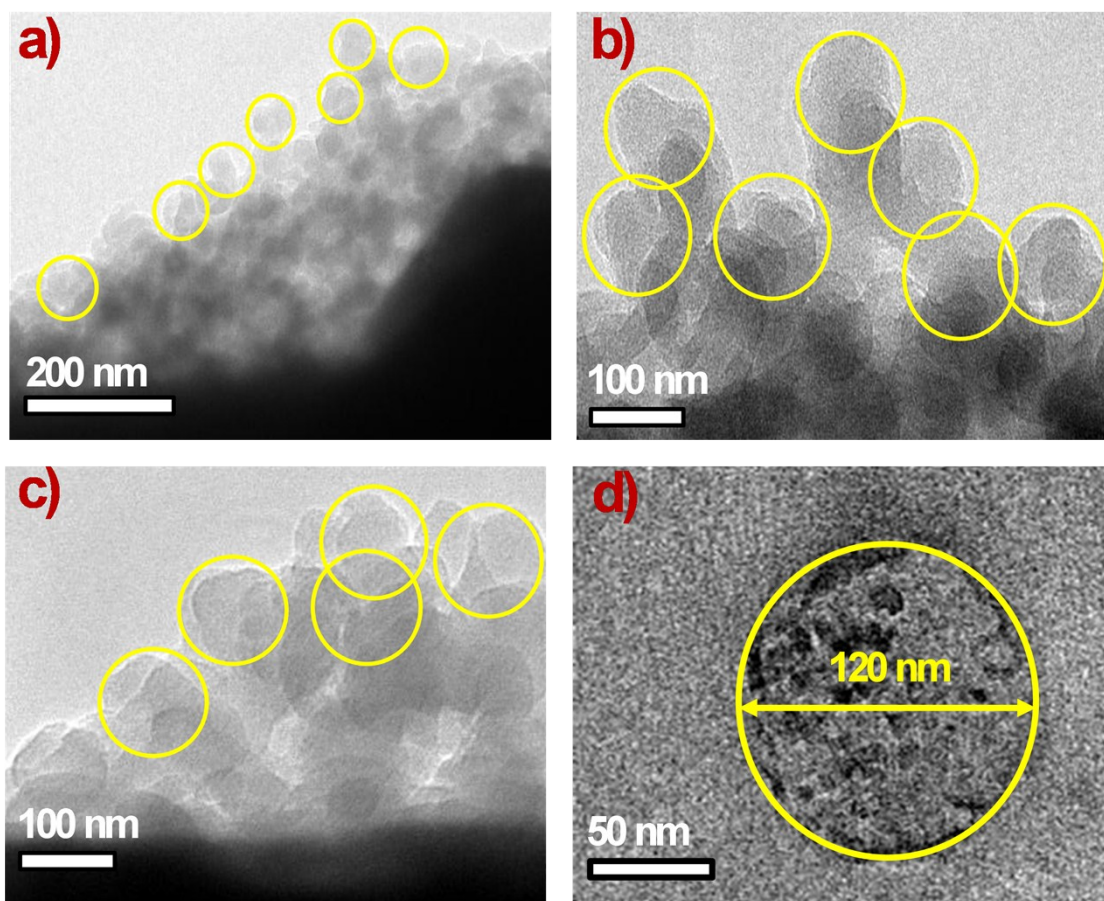

**Fig. S2** TEM images of the sulphur particles forms during ESD over a TEM grid after 1 min of deposition, a) image at lower magnification, b, c) images at higher magnification at two different regions, d) Single particle of amorphous sulphur.

**Table S1** Spray current measurements at varying applied voltages and tip to collector distances.

| Tip to collector distance | Applied voltage | Spray current | Remarks          |
|---------------------------|-----------------|---------------|------------------|
| 6 mm                      | 1.3 kV          | 0.01440 nA    | no spray         |
|                           | 1.4 kV          | 0.03084 nA    | no spray         |
|                           | 1.5 kV          | 9.93265 nA    | spray plume      |
|                           | 1.6 kV          | 11.6066 nA    | spray plume      |
|                           | 1.7 kV          | 12.0823 nA    | spray plume      |
|                           | 1.8 kV          | 14.5945 nA    | spray plume      |
|                           | 1.9 kV          | 23.3021 nA    | liquid Jet spray |
|                           | 2.0 kV          | 28.9206 nA    | liquid Jet spray |
|                           | 2.1 kV          | 37.837 nA     | liquid Jet spray |
|                           | 2.2 kV          | 49.499 nA     | liquid Jet spray |
| 2 mm                      | 1.65 kV         | 36.205 nA     | liquid jet spray |
| 4 mm                      |                 | 20.2080 nA    | liquid jet spray |
| 6 mm                      |                 | 10.3652 nA    | spray plume      |
| 8 mm                      |                 | 9.5611 nA     | spray plume      |
| 10 mm                     |                 | 0.2356 nA     | no spray         |
| 12 mm                     |                 | 0.01249 nA    | no spray         |

- ❖ Spray current in the range of 10 to 15 nA is suitable for gentle spray emission. Spray currents more than 20 nA is due to liquid jet formation and it is inappropriate for the experiments.

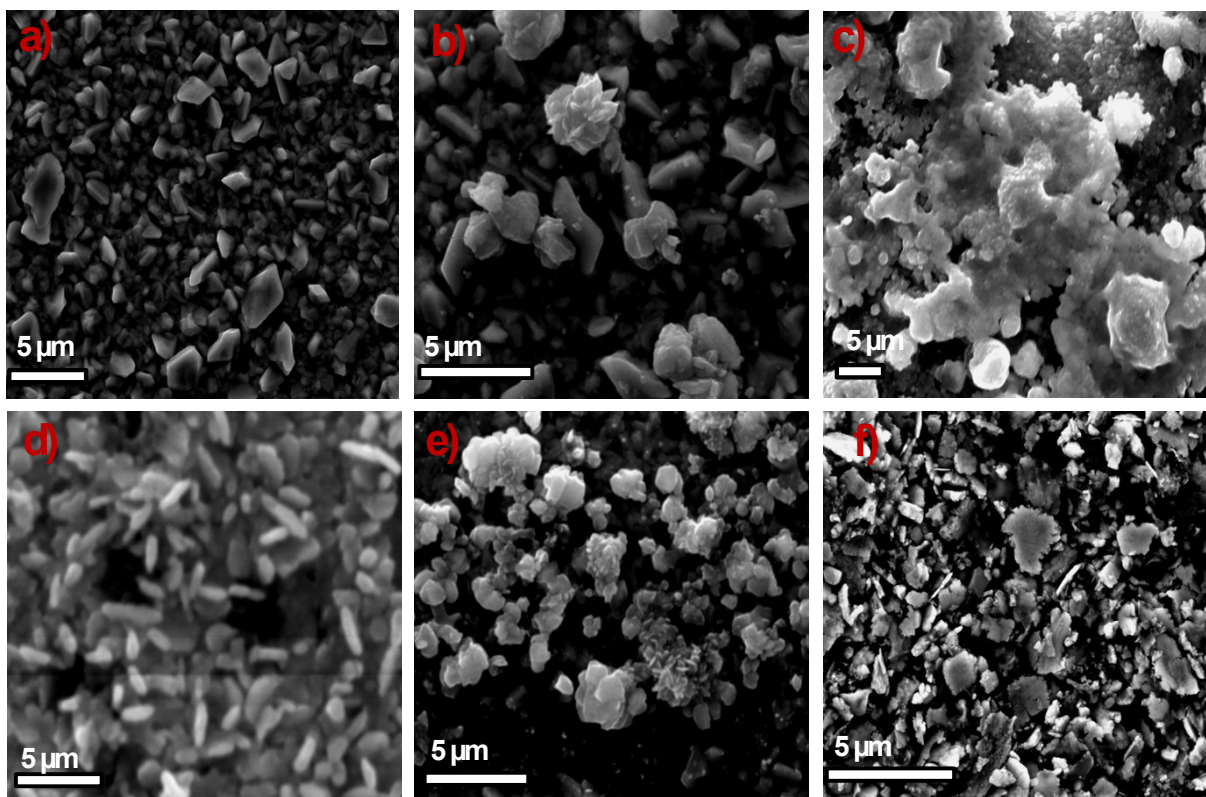

**Fig. S3** a, b, c) SEM images of the TEM grid after different times of sulphur spray (a) 3 min, (b) 7 min, (c) 30 min. d, e, f) SEM images of the copper plate after different time of spray, (d) 7 min, (e) 15 min and (f) toluene extracted platelets after 15 mins of spray.

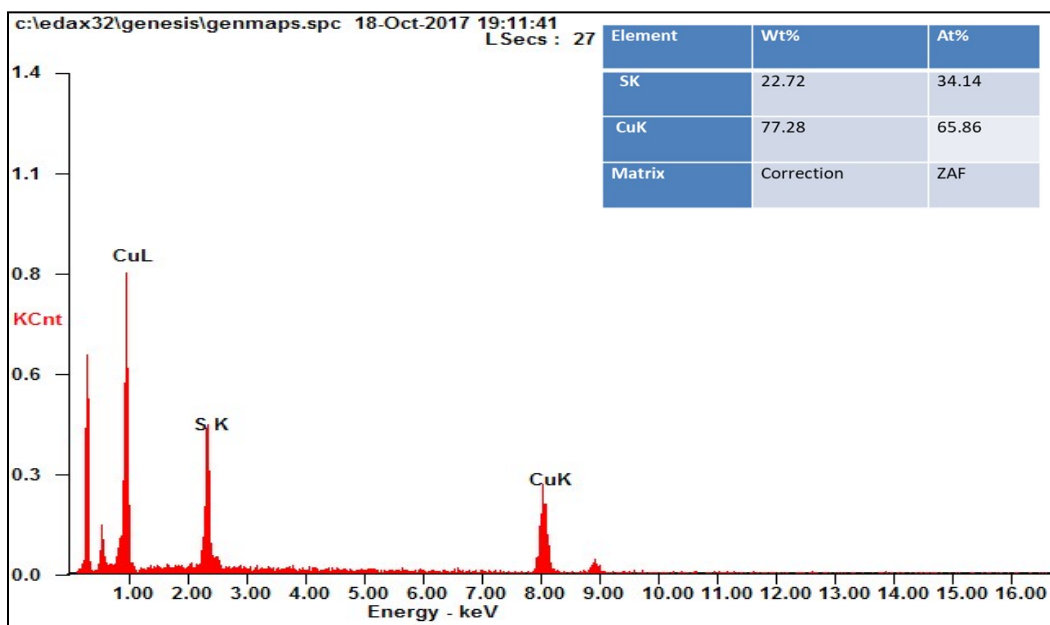

**Fig. S4** EDAX spectrum of the  $\text{Cu}_2\text{S}$  nanoplatelets (inset shows the elemental distribution of the  $\text{Cu}_2\text{S}$  nanoplatelets).

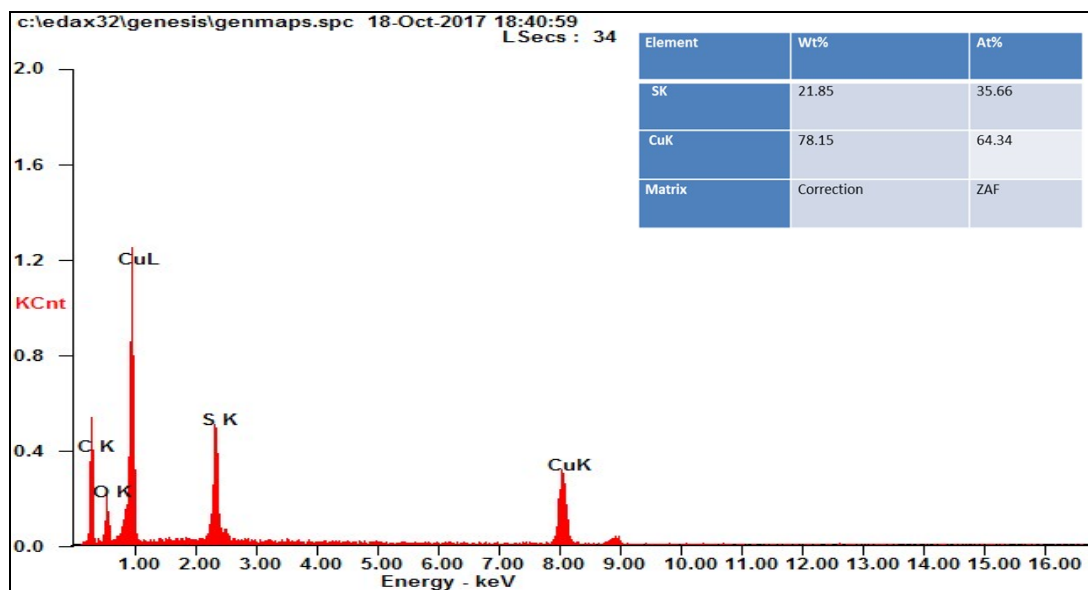

**Fig. S5** EDAX spectrum of the  $\text{Cu}_{1.8}\text{S}$  platelets (inset shows the elemental distribution for the  $\text{Cu}_{1.8}\text{S}$  platelets).

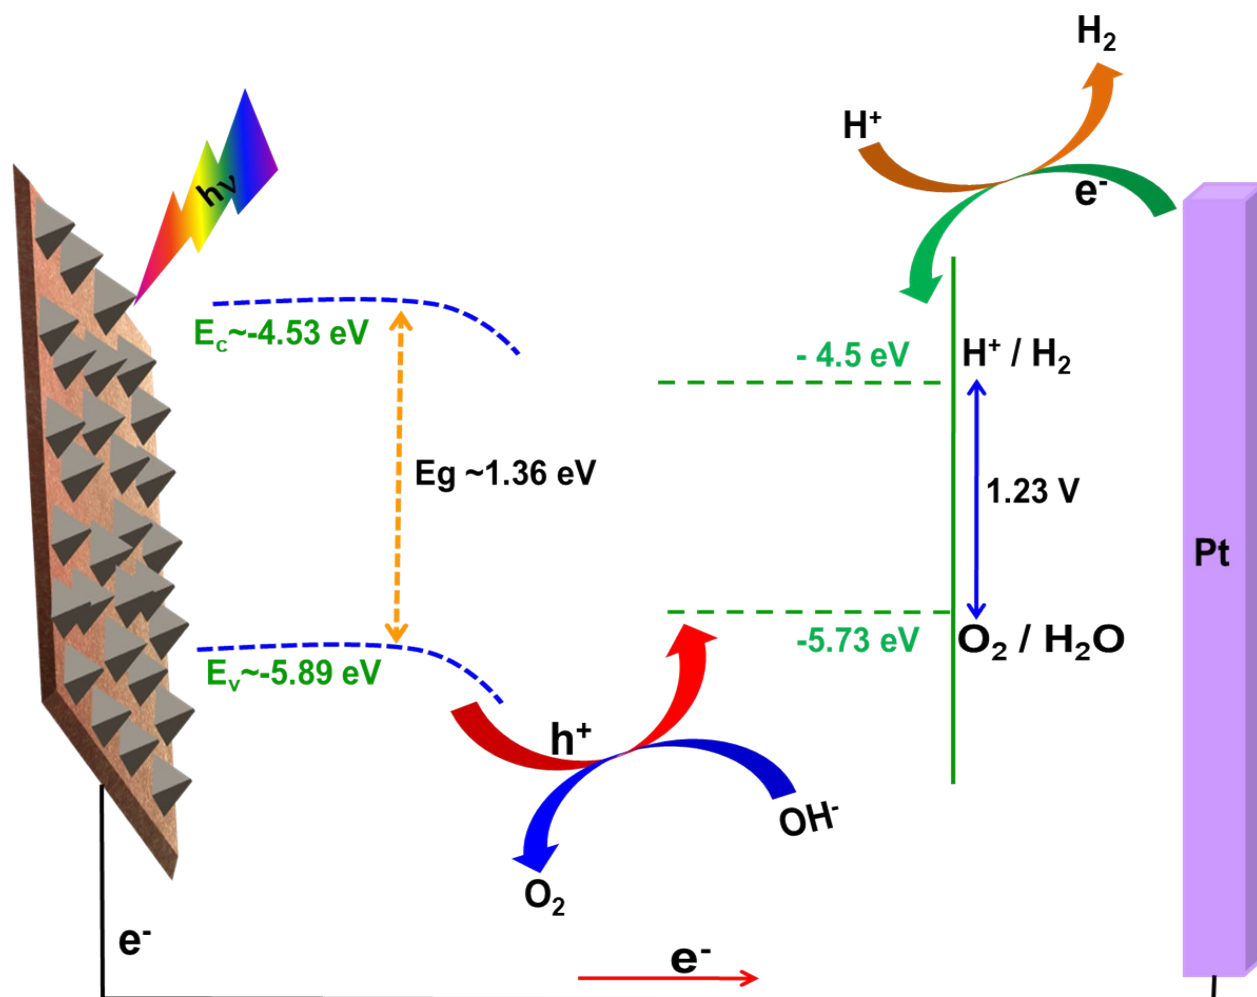

**Fig. S6** Schematic representation of the photoelectrochemical process at Cu<sub>2</sub>S nanopyramids.

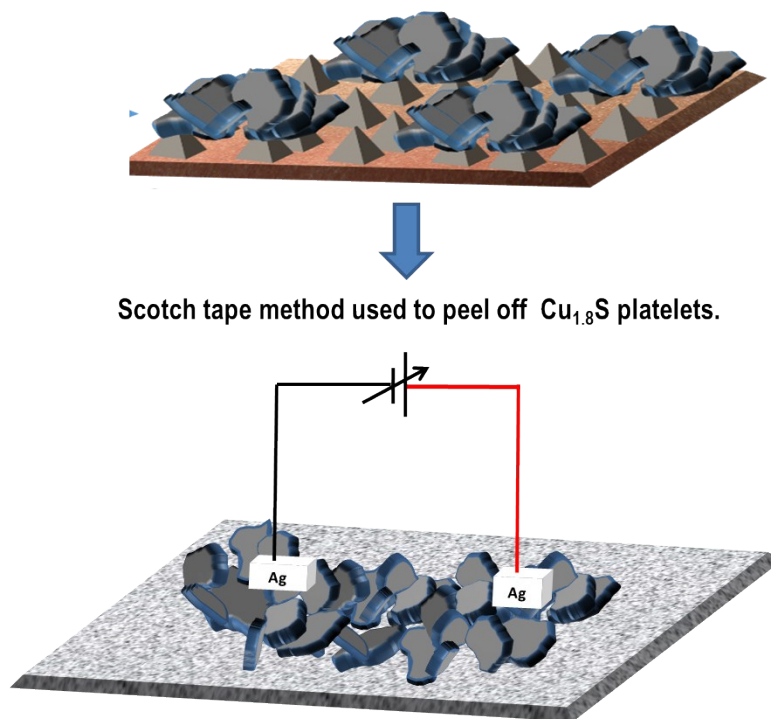

**Fig. S7** Schematic representation of the scotch tape peeled off method of  $\text{Cu}_{1.8}\text{S}$  platelets and electrical circuit preparation for solid state conductivity measurements.

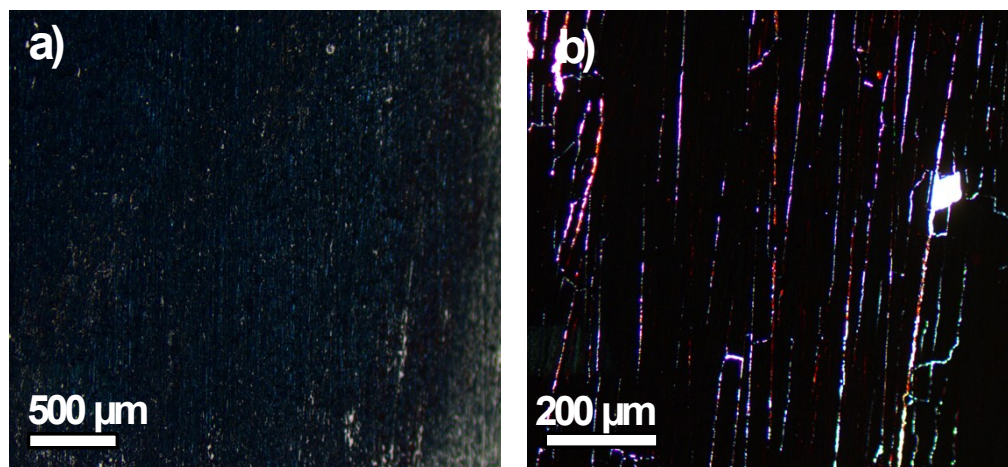

**Fig. S8** Optical microscopic images of the film made by  $\text{Cu}_{1.8}\text{S}$  platelets at different a) 10X and b) 40X magnification.

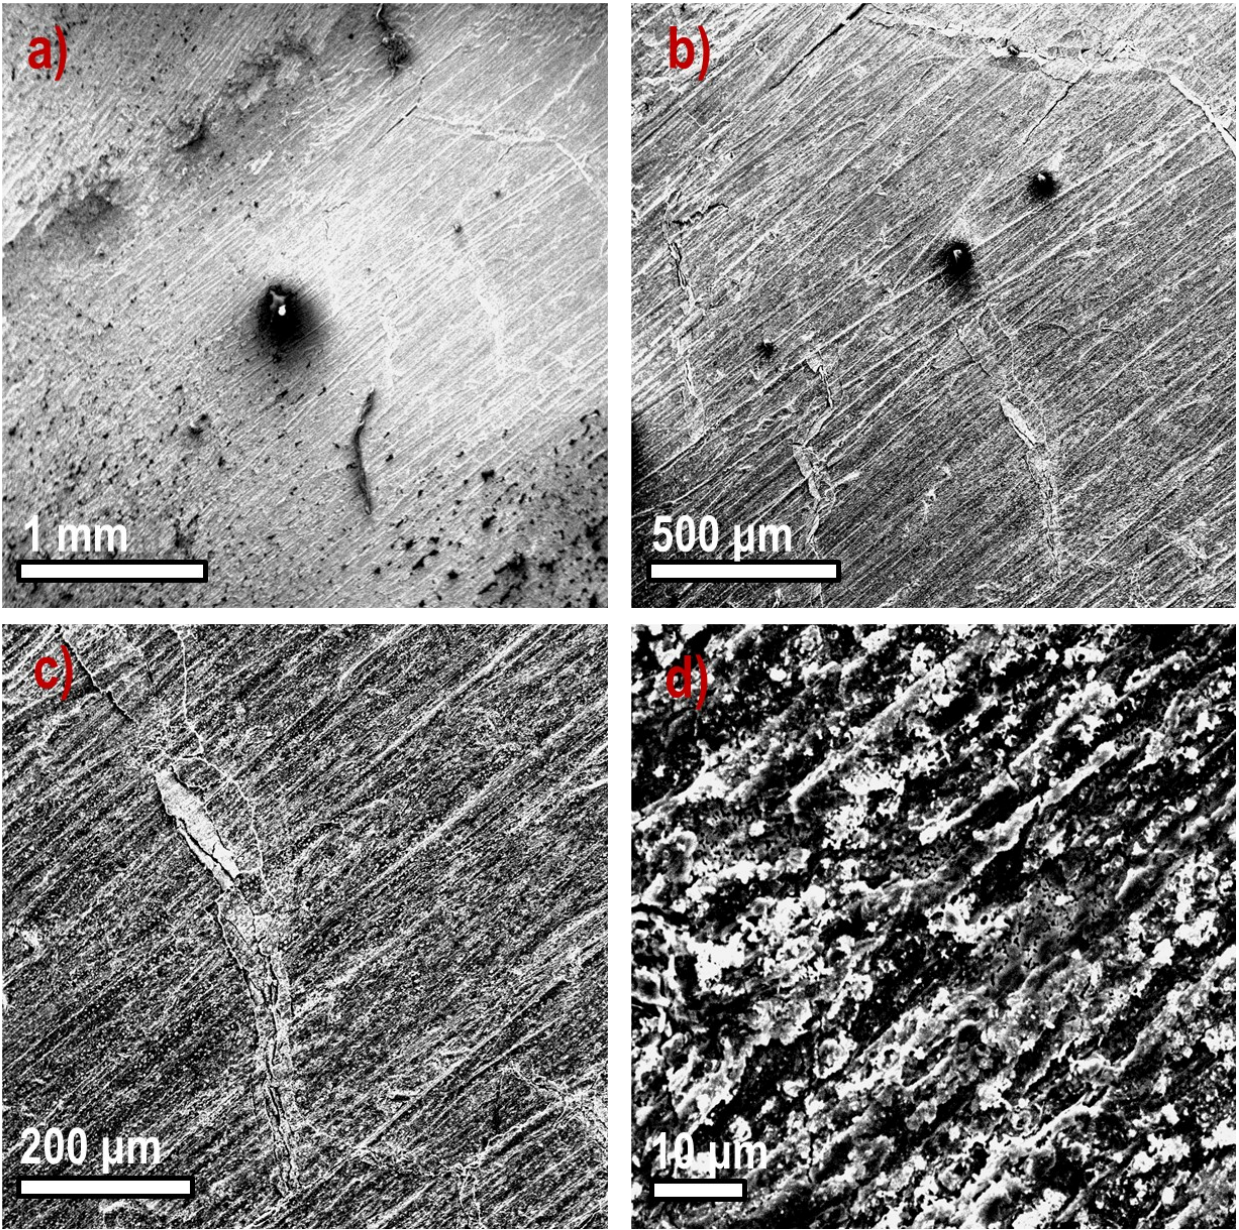

**Fig. S9** SEM images of the film under different magnification, a, b) lower magnification and c, d) higher magnification.
